# Supplementary material for: Enhanced removal performance of arsenate and arsenite by magnetic graphene oxide with high iron oxide loading
Source: Royal Society of Chemistry journal article supplement (doi:10.1039/c4cp04835k), 2014-12-24
Supplement: c4cp04835k1.pdf [file c4cp04835k1.pdf]

## Support information

### **Enhanced removal performance of arsenate and arsenite by magnetic graphene oxide with high iron oxide loading**

Fei Yu<sup>a, b</sup>, Sainan Sun<sup>a</sup>, Jie Ma<sup>b\*</sup>, Sheng Han<sup>a\*</sup>

*<sup>a</sup> School of Chemical and Environmental Engineering, Shanghai Institute of  
Technology, 100 Hai Quan Road, Shanghai 201418, China*

*<sup>b</sup> State Key Laboratory of Pollution Control and Resource Reuse, School of  
Environmental Science and Engineering, Tongji University, 1239 Siping Road,  
Shanghai 200092, China*

## Data analysis

### Isotherm model

#### Langmuir model

The form of the Langmuir isotherm can be represented by the following equation:

$$q_e = q_m \frac{K_L C}{1 + K_L C} \quad (1)$$

where  $q_e$  is the amount of arsenic adsorbed per gram of adsorbent (mg/g),  $C$  denotes the equilibrium concentration of arsenic in solution (mg/L);  $K_L$  represents the Langmuir constant (L/mg) that relates to the affinity of binding sites and  $q_m$  is a theoretical limit of adsorption capacity when the monolayer surface is fully covered with arsenic molecules to assist in the comparison of adsorption performance (mg/g). Furthermore, the effect of the isotherm shape was studied to understand whether an adsorption system is favorable or not. Another important parameter,  $R_L$ , called the separation factor or equilibrium parameter, which can be used to determine the feasibility of adsorption in a given concentration range over adsorbent, was also evaluated from the relation[23]:

$$R_L = \frac{1}{1 + K_L C_0} \quad (2)$$

where  $K_L$  is the Langmuir adsorption constant (l/mg) and  $C_0$  is the initial arsenic concentration (30mg/l). Ho and McKay[24] established that (1)  $0 < R_L < 1$  for favorable adsorption; (2)  $R_L > 1$  for unfavorable adsorption; (3)  $R_L = 1$  for linear adsorption; and (4)  $R_L = 0$  for irreversible adsorption.

#### Freundlich model

The Freundlich isotherm model has the following form:

$$q_e = K_F C^{1/n} \quad (3)$$

where  $q_e$  is the amount of arsenic adsorbed per gram of adsorbent (mg/g);  $C$  is the equilibrium arsenic concentration in solution (mg/L);  $K_F$  and  $n$  are the Freundlich constants, which represent the adsorption capacity and the adsorption strength,

respectively. The magnitude of  $1/n$  quantifies the favorability of adsorption and the degree of heterogeneity of the adsorbent surface.

Dubinin-Radushkevich (D-R) model

The D-R isotherm model has the following form:

$$\ln q_e = \ln q_m - B\varepsilon^2 \quad (4)$$

$B$ , a constant related to the mean free energy of adsorption ( $\text{mol}^2/\text{kJ}^2$ );  $q_m$ , the theoretical saturation capacity; and  $\varepsilon$ , the Polanyi potential, which is equal to

$$\varepsilon = RT \ln\left(1 + \frac{1}{C}\right) \quad (5)$$

where  $R$  ( $\text{J}\cdot\text{mol}^{-1}\cdot\text{K}^{-1}$ ) is the gas constant and  $T$  (K) is the absolute temperature. For D-R isotherm model, from  $B$  values the mean energy of adsorption.  $E$  can be calculated using the relation[25]

$$E = \frac{1}{\sqrt{-2B}} \quad (6)$$

Based on equations (4), (5) and (6), the isotherm constants,  $E$  and determination coefficients were calculated. The mean energy of adsorption ( $E$ ) is the free energy change when one mole of the ion is transferred from infinity in the solution to the surface of the solid.

### **Kinetic model**

Pseudo-first and pseudo-second model

The linear form of pseudo first-order rate equation is

$$\ln(q_e - q_t) = \ln q_e - \frac{K_1}{2.303} t \quad (7)$$

where  $q_e$  and  $q_t$  are the amounts of MO adsorbed (mg/g) at equilibrium and time  $t$  (min), respectively;  $K_1$  is the rate constant of the pseudo first-order kinetic model ( $\text{min}^{-1}$ )[24].

A linear form of pseudo second-order kinetic model is express by eq. (8)

$$\frac{t}{q} = \frac{1}{k_2 q_e^2} + \frac{t}{q_e} \quad (8)$$

where  $k_2$  is the rate constant( $\text{g}\cdot\text{mg}^{-1}\cdot\text{min}^{-1}$ ) of pseudo second-order kinetic model for adsorption[24].

### Weber-Morris kinetics model

Intra-particle mass transfer diffusion model proposed by Weber and Morris can be written as follows[26]:

$$q_t = k_i t^{1/2} + C \quad (9)$$

where  $C$  (mg/g) is the intercept and  $k_i$  is the intra-particle diffusion rate constant ( $\text{g} \cdot \text{mg}^{-1} \cdot \text{min}^{-0.5}$ ) for adsorption.

### Boyd model

Boyd model [27] has the following form:

$$Bt = -\ln\left(1 - \frac{q_t}{q_e}\right) - 0.4977 \quad (10)$$

where  $q_t$  and  $q_e$  are the amounts of dyes adsorbed on the adsorbent ( $\text{mg} \cdot \text{g}^{-1}$ ) at time  $t$  (min) and at equilibrium time (minute), respectively;  $B = \pi^2 D_i / r^2$  ( $D_i$  is the effective diffusion coefficient of the adsorbate and  $r$  is the radius of adsorbent particles assumed to be spherical).

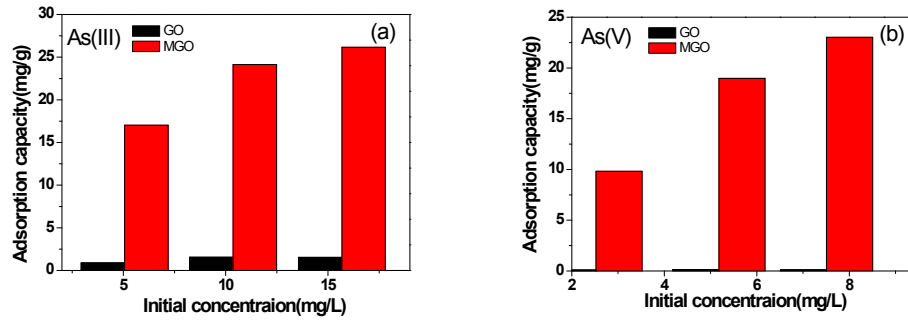

Fig. S1 Comparison of As(III) and As(V) on MGO and GO (The pH of As (III), As(V) was 8 and 5, the dosage of absorbent was 0.25 g/L)

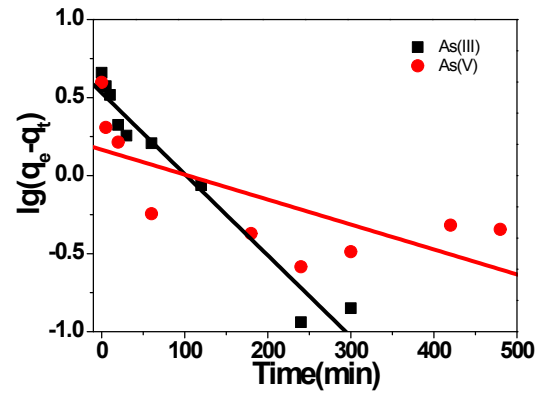

Fig. S2. pseudo-first-order model of As(III) and As(V) adsorption on MGO.

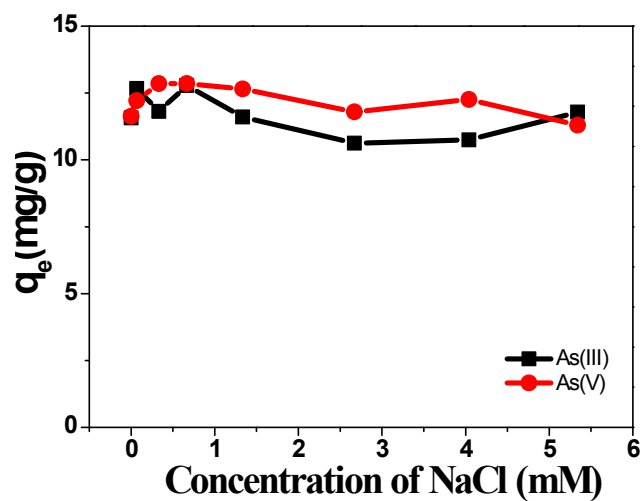

Fig. S3 Effect of ionic strength on adsorption capacity of As(III) and As(V) on MGO.(The initial concentration of As (III), As (V) were 2 mg/L, the dosage of adsorbent was 0.2 g/L. The initial pH of As (III) and As (V) were respectively 8 and 5)

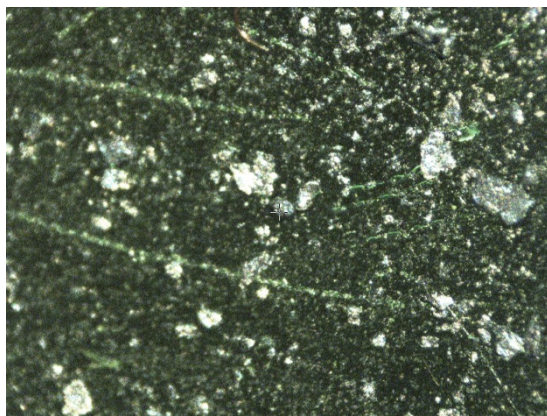

Fig. S4 Photograph of MGO-As(IV)
